# Supplementary material for: Living with conduct problem youth: family functioning and parental perceptions of their child
Source: PubMed Central journal article supplement (PMC5945745; doi:10.1007/s00787-017-1088-6), 2017-12-04
Supplement: 787_2017_1088_MOESM2_ESM.pdf [file 787_2017_1088_MOESM2_ESM.pdf]

Living with conduct problem youth: Family functioning and parental perceptions of their child

Ruth Roberts<sup>1\*</sup>, Eamon McCrory<sup>1</sup>, Helene Joffe<sup>1</sup>, Nicole De Lima<sup>2</sup> & Essi Viding<sup>1</sup>

<sup>1</sup>Division of Psychology and Language Sciences, University College London, 26 Bedford Way, London WC1H 0AP, UK

<sup>2</sup>School of Psychology, Cardiff University, Tower Building, 70 Park Place, Cardiff, CF10 3AT, UK

\*Corresponding author:

Ruth Roberts

Email: [r.roberts@ucl.ac.uk](mailto:r.roberts@ucl.ac.uk)

Online resource 2. *Qualitative themes for parental descriptions of their child*

| Group | Theme              | Codes                     | Example                                                                                                                                |
|-------|--------------------|---------------------------|----------------------------------------------------------------------------------------------------------------------------------------|
| HCU   | Dichotomous Child  | Changeable moods          | "Overall we describe him as a complete contradiction, enchanting one minute and unbearable the next."                                  |
|       |                    | Instrumental charm        | "He can switch back to being extremely nice and charming when it suits him and most of the time this is due to him wanting something." |
| LCU   | Cheeky Child       | Normalising behaviour     | "He can be aggressive towards me only at times and has had some counselling for this."                                                 |
|       |                    | Warmth & affection        | "___ is very kind, caring and not afraid to show it."                                                                                  |
|       | Rapport with Child | Characterisation of child | "_____ is interested and reflective of the world around him"                                                                           |
