# Supplementary material for: Living with conduct problem youth: family functioning and parental perceptions of their child
Source: PubMed Central journal article supplement (PMC5945745; doi:10.1007/s00787-017-1088-6), 2017-12-04
Supplement: 787_2017_1088_MOESM3_ESM.pdf [file 787_2017_1088_MOESM3_ESM.pdf]

Living with conduct problem youth: Family functioning and parental perceptions of their child

Ruth Roberts<sup>1\*</sup>, Eamon McCrory<sup>1</sup>, Helene Joffe<sup>1</sup>, Nicole De Lima<sup>2</sup> & Essi Viding<sup>1</sup>

<sup>1</sup>Division of Psychology and Language Sciences, University College London, 26 Bedford Way, London WC1H 0AP, UK

<sup>2</sup>School of Psychology, Cardiff University, Tower Building, 70 Park Place, Cardiff, CF10 3AT, UK

\*Corresponding author:

Ruth Roberts

Email: [r.roberts@ucl.ac.uk](mailto:r.roberts@ucl.ac.uk)

Online resource 3. *Covariate analysis for conditions comorbid with conduct problems*

| FAD subscales            | ANOVA  |              | Tukey post hoc |              |          | ANCOVA |                                           |       |                                           |       |                                           |        |                                           |        |                                           | <i>post hoc</i>  |                            |
|--------------------------|--------|--------------|----------------|--------------|----------|--------|-------------------------------------------|-------|-------------------------------------------|-------|-------------------------------------------|--------|-------------------------------------------|--------|-------------------------------------------|------------------|----------------------------|
|                          | F      | <i>p</i>     | Group          | <i>p</i>     | <i>d</i> | ADHD   |                                           | GAD   |                                           | MDE   |                                           | AUDIT  |                                           | DUDIT  |                                           |                  |                            |
| Affective involvement    | 11.704 | <b>0.000</b> | TD – HCU       | <b>0.000</b> | -1.170   | 5.078  | <b>0.008</b><br>(TD-HCU<br><b>0.008</b> ) | 5.263 | <b>0.007</b><br>(TD-HCU<br><b>0.012</b> ) | 7.565 | <b>0.001</b><br>(TD-HCU<br><b>0.001</b> ) | 10.902 | <b>0.000</b><br>(TD-HCU<br><b>0.000</b> ) | 11.043 | <b>0.000</b><br>(TD-HCU<br><b>0.000</b> ) | <b>1\2 &gt;3</b> |                            |
|                          |        |              | TD – LCU       | 0.057        | -0.685   |        |                                           |       |                                           |       |                                           |        |                                           |        |                                           |                  |                            |
|                          |        |              | HCU – LCU      | <b>0.028</b> | -0.620   |        |                                           |       |                                           |       | <b>(HCU-LCU<br/>0.042)</b>                |        | <b>(HCU-LCU<br/>0.038)</b>                |        | <b>(HCU-LCU<br/>0.030)</b>                |                  | <b>(HCU-LCU<br/>0.027)</b> |
| General functioning      | 3.319  | <b>0.041</b> | TD - HCU       | <b>0.040</b> | -0.628   | 0.857  | 0.428                                     | 0.481 | 0.619                                     | 2.022 | 0.138                                     | 3.248  | <b>0.043</b><br>(TD-HCU<br><b>0.049</b> ) | 2.943  | 0.058                                     |                  |                            |
|                          |        |              | TD – LCU       | 0.139        |          |        |                                           |       |                                           |       |                                           |        |                                           |        |                                           |                  |                            |
|                          |        |              | HCU – LCU      | 0.839        |          |        |                                           |       |                                           |       |                                           |        |                                           |        |                                           |                  |                            |
| Roles                    | 5.399  | <b>0.006</b> | TD – HCU       | <b>0.005</b> | -0.818   | 3.098  | 0.050                                     | 2.695 | 0.073                                     | 3.898 | <b>0.024</b><br>(TD-HCU<br><b>0.023</b> ) | 4.847  | <b>0.010</b><br>(TD-HCU<br><b>0.009</b> ) | 4.550  | <b>0.013</b><br>(TD-HCU<br><b>0.011</b> ) |                  |                            |
|                          |        |              | TD – LCU       | 0.055        | -0.633   |        |                                           |       |                                           |       |                                           |        |                                           |        |                                           |                  |                            |
|                          |        |              | HCU – LCU      | 0.650        |          |        |                                           |       |                                           |       |                                           |        |                                           |        |                                           |                  |                            |
| Problem solving          | 2.193  | 0.117        |                |              |          | 1.416  | 0.248                                     | 1.095 | 0.339                                     | 2.774 | 0.070                                     | 2.533  | 0.085                                     | 1.931  | 0.151                                     |                  |                            |
| Communication            | 0.048  | 0.953        |                |              |          | 0.254  | 0.776                                     | 0.224 | 0.800                                     | 0.088 | 0.916                                     | 0.099  | 0.906                                     | 0.017  | 0.983                                     |                  |                            |
| Affective responsiveness | 1.104  | 0.336        |                |              |          | 1.178  | 0.313                                     | 0.766 | 0.468                                     | 0.791 | 0.457                                     | 1.668  | 0.194                                     | 1.855  | 0.162                                     |                  |                            |
| Behaviour control        | 0.008  | 0.992        |                |              |          | 0.015  | 0.985                                     | 0.073 | 0.930                                     | 0.009 | 0.991                                     | 0.022  | 0.978                                     | 0.023  | 0.977                                     |                  |                            |

TD= typically developing; HCU = high levels of callous-unemotional traits (and conduct problems); LCU = low levels of callous-unemotional traits (and conduct problems); FAD = McMaster Family Assessment Device; ADHD = Attention deficit hyperactivity disorder; GAD = Generalised anxiety disorder; MDE = Major depressive episode; AUDIT = Alcohol Use Disorders Identification Test scores; DUDIT = Drug Use Disorders Identification Test scores.

There is a statistically significant effect of group on affective involvement even after controlling for the following covariates: ADHD, GAD, MDE, AUDIT, DUDIT. Post hoc analysis indicates a significant difference between the TD and HCU groups and the HCU and LCU groups except when controlling for ADHD where there is no significant difference between HCU and LCU groups.

There is no statistically significant effect of group on general functioning when controlling for ADHD, GAD, MDE or DUDIT. There is no statistically significant effect of group on roles when controlling for ADHD or GAD.

There is no statistically significant effect of group on problem solving, communication, affective responsiveness, and behaviour control after controlling for any of the following covariates: ADHD, GAD, MDE, AUDIT, DUDIT.
