# Supplementary material for: Living with conduct problem youth: family functioning and parental perceptions of their child
Source: Eur Child Adolesc Psychiatry. 2017 Dec 4;27(5):595–604. doi: 10.1007/s00787-017-1088-6 (PMC5945745; doi:10.1007/s00787-017-1088-6)
Supplement: Supplementary file 1 — Supplementary material 1 (PDF 6 kb) [file 787_2017_1088_MOESM1_ESM.pdf]

## Living with conduct problem youth: Family functioning and parental perceptions of their child

Ruth Roberts<sup>1\*</sup>, Eamon McCrory<sup>1</sup>, Helene Joffe<sup>1</sup>, Nicole De Lima<sup>2</sup> & Essi Viding<sup>1</sup>

<sup>1</sup>Division of Psychology and Language Sciences, University College London, 26 Bedford Way, London WC1H 0AP, UK

<sup>2</sup>School of Psychology, Cardiff University, Tower Building, 70 Park Place, Cardiff, CF10 3AT, UK

\*Corresponding author:

Ruth Roberts

Email: [r.roberts@ucl.ac.uk](mailto:r.roberts@ucl.ac.uk)

### Online resource 1. *Description of the McMaster Family Assessment Device scales*

| Subscale                 | Domain                                                                                                |
|--------------------------|-------------------------------------------------------------------------------------------------------|
| Problem solving          | The family's ability to resolve problems                                                              |
| Communication            | The way in which the family exchanges information                                                     |
| Roles                    | How individuals fulfil family functions and responsibilities                                          |
| Affective responsiveness | The family's ability to respond to others and events with a range of appropriate actions and emotions |
| Affective involvement    | The degree of interest in and value shown toward other family member's activities and interests       |
| Behaviour control        | The pattern that the family employs for behaviour management                                          |
| General functioning      | A composite measure of overall family functioning                                                     |

Epstein NB, Baldwin LM, Bishop DS (1983) The McMaster Family Assessment Device. *J Marital Fam Ther* 9:171-180

Miller I, Ryan C, Keitner G, Bishop D, Epstein N (2000) The McMaster approach to families: theory, assessment, treatment and research. *J Fam Ther* 22:168-189
